# Supplementary material for: Structural studies of RFCC tf18 reveal a novel chromatin recruitment role for Dcc1
Source: PubMed Central journal article supplement (PMC5376975; doi:10.15252/embr.201642825), 2017-02-10
Supplement: EMBR-18-558-s001.pdf [file EMBR-18-558-s001.pdf]

## APPENDIX

### Contents

**Appendix Table S1.** X-ray data collection and refinement statistics

**Appendix Table S1.** X-ray data collection and refinement statistics

| Dataset                                 | Ctf18C-Dcc1-Ctf8                  | Dcc1 <sup>90-380</sup> Native         | Dcc1 <sup>90-380</sup> Peak                   | Dcc1 <sup>90-380</sup> Inflection             |
|-----------------------------------------|-----------------------------------|---------------------------------------|-----------------------------------------------|-----------------------------------------------|
| Wavelength (Å)                          | 0.9763                            | 0.92                                  | 0.9796                                        | 0.9797                                        |
| Resolution range                        | 60.64 - 2.29 (2.372 - 2.29)       | 29 - 2.002 (2.074 - 2.002)            | 79.19 - 2.75 (2.82 - 2.75)                    | 112.75 - 2.96 (3.04 - 2.96)                   |
| Space group                             | P2 <sub>1</sub>                   | P2 <sub>1</sub>                       | P2 <sub>1</sub> 2 <sub>1</sub> 2 <sub>1</sub> | P2 <sub>1</sub> 2 <sub>1</sub> 2 <sub>1</sub> |
| Unit cell (Å, °)                        | 58.61 164.22 60.64<br>90 90.55 90 | 68.682 100.697 83.495<br>90 100.67 90 | 96.69 111.75 112.23<br>90.00 90.00 90.00      | 96.82 112.02 112.75<br>90.00 90.00 90.00      |
| Total reflections                       | 138884 (5577)                     | 288441 (23107)                        | 415363 (28991)                                | 336993 (24158)                                |
| Unique reflections                      | 46232 (2926)                      | 71317 (6489)                          | 32295 (2349)                                  | 26214 (1898)                                  |
| Multiplicity                            | 3.0 (1.9)                         | 4.0 (3.6)                             | 12.9 (12.3)                                   | 12.9 (12.7)                                   |
| Completeness (%)                        | 0.90 (0.57)                       | 0.95 (0.87)                           | 99.9 (99.9)                                   | 99.9 (99.8)                                   |
| Mean I/sigma(I)                         | 7.15 (1.31)                       | 8.43 (1.31)                           | 15.7 (3.3)                                    | 15.8 (3.8)                                    |
| Wilson B-factor                         | 43.9                              | 29.31                                 | 55.8                                          | 45.9                                          |
| R <sub>merge</sub>                      | 0.08522 (0.4577)                  | 0.1158 (0.9735)                       | 0.143 (0.822)                                 | 0.132 (0.746)                                 |
| R <sub>meas</sub>                       | 0.1022 (0.5954)                   | 0.1333 (1.138)                        | 0.149 (0.858)                                 | 0.137 (0.778)                                 |
| CC <sub>1/2</sub>                       | 0.994 (0.732)                     | 0.995 (0.523)                         | 0.996 (0.901)                                 | 0.996 (0.881)                                 |
| No. Sites                               | -                                 | -                                     | 33                                            | -                                             |
| Figure of merit -<br>acentric (centric) | -                                 | -                                     | 0.35491 (0.11335)                             |                                               |
| Phasing Power                           | -                                 | -                                     | 1.473                                         | 0.391                                         |
| CC*                                     | 0.999 (0.919)                     | 0.999 (0.829)                         |                                               |                                               |
| Reflections used in<br>refinement       | 46206 (2922)                      | 71312 (6489)                          |                                               |                                               |
| R <sub>work</sub>                       | 0.2018 (0.2967)                   | 0.1903 (0.2844)                       |                                               |                                               |
| R <sub>free</sub>                       | 0.2586 (0.3716)                   | 0.2356 (0.3249)                       |                                               |                                               |
| CC(work)                                | 0.950 (0.820)                     | 0.946 (0.641)                         |                                               |                                               |
| CC(free)                                | 0.914 (0.591)                     | 0.927 (0.577)                         |                                               |                                               |
| Number of non-<br>hydrogen atoms        | 8784                              | 8634                                  |                                               |                                               |
| macromolecules                          | 8518                              | 8112                                  |                                               |                                               |
| Protein residues                        | 1050                              | 1008                                  |                                               |                                               |
| RMS (bonds)                             | 0.01                              | 0.014                                 |                                               |                                               |
| RMS (angles)                            | 1.54                              | 1.41                                  |                                               |                                               |
| Ramachandran<br>favoured (%)            | 96                                | 97                                    |                                               |                                               |
| Ramachandran<br>allowed (%)             | 2.8                               | 2.5                                   |                                               |                                               |
| Ramachandran<br>outliers (%)            | 1.1                               | 0                                     |                                               |                                               |
| Rotamer outliers (%)                    | 2.3                               | 2.8                                   |                                               |                                               |
| Clashscore                              | 9.77                              | 5.43                                  |                                               |                                               |
| Average B-factor                        | 52.99                             | 36.33                                 |                                               |                                               |
| macromolecules                          | 53.07                             | 36.05                                 |                                               |                                               |
| solvent                                 | 50.5                              | 40.74                                 |                                               |                                               |
